# Supplementary material for: A widely distributed metalloenzyme class enables gut microbial metabolism of host- and diet-derived catechols
Source: eLife. 2020 Feb 18;9:e50845. doi: 10.7554/eLife.50845 (PMC7028382; doi:10.7554/eLife.50845)
Supplement: Figure 1—source data 1. [file elife-50845-fig1-data1.xlsx]

## Sheet: Fig 1C
	% conversion	N.D = metabolite not detected
		1	2	3	Mean	SEM
	Caffiec acid	N.D	N.D	N.D
	Hydrocaffeic acid	N.D	N.D	N.D
	(-)-epicatechin	N.D	N.D	N.D
	(+)-catechin	N.D	N.D	N.D
	Protocatechuic acid	N.D	N.D	N.D
	DOPAC	N.D	N.D	N.D
	Ellagic acid	N.D	N.D	N.D
	DL-Epinephrine	N.D	N.D	N.D
	DL-Norepinephrine	52.8799	66.4672	43.1106	54.1525	6.77245
	Dopamine	88.1137	95.0799	99.4914	94.2283	3.31195
	Dopamine, no enzyme	N.D	N.D	N.D

## Sheet: Fig 1E
	% conversion	N.D = metabolite not detected
		1	2	3	Mean	SEM
	1	N.D	N.D	N.D
	2	N.D	N.D	N.D
	3	N.D	N.D	N.D
	4	N.D	N.D	N.D
	5	N.D	N.D	N.D
	6	N.D	N.D	N.D
	7	N.D	N.D	N.D
	8	N.D	N.D	N.D
	9	N.D	N.D	N.D
	10	98.9056	98.594	98.6383	98.7126	0.0973302
	11	90.4792	81.145	90.8525	87.4922	3.17545
	12	30.1261	11.8729	24.2678	22.0889	5.38069
	13	81.8277	100.777	105.955	96.1863	7.33328
	14	N.D	N.D	N.D
	Dopamine, no enzyme	N.D	N.D	N.D

## Sheet: Fig 1F
	N.S = not significantly upregulated
	% Conversion by E. lenta culture						dadh foldchange (FDR<0.01)
		1	2	3	Mean	SEM
	Analog 1	1.93937	1.04493	1.97147	1.65192	0.303638	N.S
	Analog 9	0	9.72222	0.35461	3.35894	3.18329	N.S
	Dopamine	97.193	97.6619	97.7545	97.5365	0.173809	11.33*
	DL-Norepinephrine	68.1467	69.7755	72.1649	70.029	1.16687	9.6
	* fold-change data from V. M. Rekdal, E. N. Bess, J. E. Bisanz, P. J. Turnbaugh, E. P. Balskus, Discovery and inhibition of an interspecies gut bacterial pathway for Levodopa metabolism. Science 364, eaau6323 (2019)
