# Supplementary material for: A widely distributed metalloenzyme class enables gut microbial metabolism of host- and diet-derived catechols
Source: eLife. 2020 Feb 18;9:e50845. doi: 10.7554/eLife.50845 (PMC7028382; doi:10.7554/eLife.50845)
Supplement: Figure 2—source data 1. [file elife-50845-fig2-data1.xlsx]

## Sheet: Fig 2A & Figure 2-supplement1
	E. lenta strain	Treatment	Endpoint OD600	% Dopamine remaining
	E. lenta A2	Vehicle	0.02
	E. lenta A2	Vehicle	0.02
	E. lenta A2	Vehicle	0.018
	E. lenta A2	Dopamine	0.032	0
	E. lenta A2	Dopamine	0.036	0
	E. lenta A2	Dopamine	0.036	0
	E. lenta DSM11767	Vehicle	0.01
	E. lenta DSM11767	Vehicle	0.01
	E. lenta DSM11767	Vehicle	0.011
	E. lenta DSM11767	Dopamine	0.019	45.0525
	E. lenta DSM11767	Dopamine	0.019	45.3523
	E. lenta DSM11767	Dopamine	0.018	22.8636
	E. lenta AB8n2	Vehicle	0.012
	E. lenta AB8n2	Vehicle	0.012
	E. lenta AB8n2	Vehicle	0.013
	E. lenta AB8n2	Dopamine	0.022	34.8348
	E. lenta AB8n2	Dopamine	0.021	17.3173
	E. lenta AB8n2	Dopamine	0.023	10.6106
	E. lenta 14A	Vehicle	0.015
	E. lenta 14A	Vehicle	0.016
	E. lenta 14A	Vehicle	0.017
	E. lenta 14A	Dopamine	0.018	120.02
	E. lenta 14A	Dopamine	0.017	94.3944
	E. lenta 14A	Dopamine	0.017	100.601
	E. lenta Valencia	Vehicle	0.017
	E. lenta Valencia	Vehicle	0.018
	E. lenta Valencia	Vehicle	0.017
	E. lenta Valencia	Dopamine	0.028	29.4294
	E. lenta Valencia	Dopamine	0.032	0.900901
	E. lenta Valencia	Dopamine	0.035	0.700701
	E. lenta MR1#2	Vehicle	0.018
	E. lenta MR1#2	Vehicle	0.017
	E. lenta MR1#2	Vehicle	0.018
	E. lenta MR1#2	Dopamine	0.017	99.1992
	E. lenta MR1#2	Dopamine	0.017	92.3924
	E. lenta MR1#2	Dopamine	0.016	98.7988
	E. lenta DSM11863	Vehicle	0.014
	E. lenta DSM11863	Vehicle	0.013
	E. lenta DSM11863	Vehicle	0.015
	E. lenta DSM11863	Dopamine	0.016	93.3934
	E. lenta DSM11863	Dopamine	0.014	96.997
	E. lenta DSM11863	Dopamine	0.013	104.204
	E. lenta W1BHI6	Vehicle	0.019
	E. lenta W1BHI6	Vehicle	0.018
	E. lenta W1BHI6	Vehicle	0.019
	E. lenta W1BHI6	Dopamine	0.018	95.0149
	E. lenta W1BHI6	Dopamine	0.019	101.19
	E. lenta W1BHI6	Dopamine	0.018	100.446
	E. lenta DSM2243	Vehicle	0.02
	E. lenta DSM2243	Vehicle	0.019
	E. lenta DSM2243	Vehicle	0.02
	E. lenta DSM2243	Dopamine	0.02	98.1399
	E. lenta DSM2243	Dopamine	0.02	101.414
	E. lenta DSM2243	Dopamine	0.02	98.7351

## Sheet: Fig 2B & Figure 2-supplement4
	N.A = not applicable
	Vehicle			1 mM nitrate			14 mM DMSO			1 mM dopamine			1 mM dopamine + 0.5 mM WO42-			1 mM dopamine + 0.5 mM MoO42-			1 mM m-Tyramine
Endpoint OD600	0.015	0.014	0.014	0.025	0.022	0.024	0.032	0.031	0.033	0.029	0.03	0.029	0.014	0.012	0.014	0.03	0.029	0.029	0.013	0.014	0.015
% Dopamine remaining	N.A	N.A	N.A	N.A	N.A	N.A	N.A	N.A	N.A	0.472069	0.393391	0.393391	90.716	94.6499	91.0307	0.393391	0.393391	0.393391	N.A	N.A	N.A

## Sheet: Fig 2C & Figure 2-supplement6
										Student's t test (two-tailed, unpaired); Proprtion of metabolizer in vehicle vs. dopamine
	Treatment	Replicate	Valencia (metabolizer) (CFU/mL)	W1BHI6 (nonmetabolizer) (CFU/mL)	Proportion of metabolizer	Average	SEM			Unpaired t test
	Vehicle	1	11250000	7500000	0.6					P value	0.0007
	Vehicle	2	15000000	8750000	0.631579					P value summary	***
	Vehicle	3	7500000	11250000	0.4	0.526791	0.0835426			Significantly different (P < 0.05)?	Yes
	Vehicle	4	3750000	8750000	0.3					One- or two-tailed P value?	Two-tailed
	Vehicle	5	15000000	7500000	0.666667					t, df	t=4.784, df=10
	Vehicle	6	11250000	8750000	0.5625
	1 mM Dopamine	1	71250000	16250000	0.814286					How big is the difference?
	1 mM Dopamine	2	66250000	8750000	0.883333					Mean of column A	0.5268
	1 mM Dopamine	3	61250000	13750000	0.816667	0.829375	0.0319724			Mean of column B	0.8294
	1 mM Dopamine	4	37500000	12500000	0.75					Difference between means (B - A) ± SEM	0.3026 ± 0.06325
	1 mM Dopamine	5	46250000	5000000	0.902439					95% confidence interval	0.1616 to 0.4435
	1 mM Dopamine	6	42500000	10000000	0.809524					R squared (eta squared)	0.6959

## Sheet: Fig 2D
		log (CFU/mL)
			Vehicle			1 mM dopamine
	E. lenta strain	1	2	3	1	2	3
	A2	7.44909	7.42935	7.42935	8	8.05115	8.02633
	W1BHI6	7.32736	7.37566	7.273	7.32736	7.32736	7.37566
	AB8n2	7.21085	7.30103	7.43933	8.09691	8	7.94201
	DSM11767	7.1383	7.273	7.09691	8.24304	8.05115	8.05115
	DSM11863	7.35218	7.24304	7.35218	7.30103	7.37566	7.32736
	14A	7.32736	7.41913	7.39794	7.41913	7.39794	7.32736

## Sheet: Fig 2E, 2F & Fig 2-supplement7
			N.D = not determined due to lack ot interpretable sequencing data or failed qPCR primer amplification
						Vehicle
		Individual	log dadh copy number	log E. lenta copy number	dadh SNP status	log dadh copy number	log E. lenta copy number	dadh SNP status		log dadh copy number t-test dopamine vs. vehicle			log E. lenta copy number in dopamine vs. vehicle			Fisher's exact test of dadh SNP count in dopamine vs. vehicle
		1	5.73027	6.5992	CGC	4.92627	5.90935	CGC								P value and statistical significance
		2	4.57669	5.52199	CGC	3.63961	4.92012	CGC/AGC		Unpaired t test			Unpaired t test			Test	Fisher's exact test
		3	3.01653	4.71118	N.D	2.95327	4.79141	N.D		P value	0.0005		P value	0.0019		P value	0.0088
		4	4.45324	5.48808	CGC	3.66207	5.00321	CGC/AGC		P value summary	***		P value summary	**		P value summary	**
		5	4.58601	5.55836	CGC	3.49712	4.93973	CGC/AGC		Significantly different (P < 0.05)?	Yes		Significantly different (P < 0.05)?	Yes		One- or two-sided	Two-sided
		6	2.13689	4.75582	CGC	2.31619	4.71648	CGC		One- or two-tailed P value?	Two-tailed		One- or two-tailed P value?	Two-tailed		Statistically significant (P < 0.05)?	Yes
		7	2.84966	4.79004	CGC	3.16541	4.83049	CGC/AGC		t, df	t=3.781, df=42		t, df	t=3.319, df=40
		8	5.28247	6.06005	CGC	4.11635	5.0779	CGC/AGC								Effect size	Value	95% CI
		9	4.30166	5.38601	CGC	2.36238	4.70392	CGC		How big is the difference?			How big is the difference?			Relative Risk	0.5	0.2800 to 0.7993
		10	4.75197	5.75799	CGC	2.79802	4.79728	CGC		Mean of column A	3.435		Mean of column A	4.863		Reciprocal of relative risk	2	1.251 to 3.571
		11	4.28163	5.36642	CGC	2.84185	N.D	CGC		Mean of column B	4.435		Mean of column B	5.429
		12	2.86085	3.81545	CGC/AGC	2.3573	4.02834	CGC/AGC		Difference between means (B - A) ± SEM	1.000 ± 0.2646		Difference between means (B - A) ± SEM	0.5663 ± 0.1706		Attributable risk (P1 - P2)	0.4286	0.2002 to 0.7523
		13	4.80486	5.23964	CGC	3.94422	4.77149	CGC		95% confidence interval	0.4665 to 1.534		95% confidence interval	0.2215 to 0.9112		NNT (reciprocal of attrib. risk)	2.333	1.329 to 4.994
		14	4.50667	5.29462	CGC	3.18523	4.83505	CGC/AGC		R squared (eta squared)	0.254		R squared (eta squared)	0.2159
		15	5.33918	5.9899	CGC	3.57961	4.67156	CGC								Odds ratio	0.125	0.03313 to 0.5390
		16	4.65854	5.25673	CGC	3.54248	4.5854	CGC								Reciprocal of odds ratio	8	1.855 to 30.19
		17	5.31611	5.99581	CGC	3.2827	4.41229	CGC/AGC
		18	4.65509	5.20567	CGC/AGC	3.22444	4.34956	CGC/AGC								Sensitivity	0.3333	0.1864 to 0.5218
		19	5.47224	6.12895	CGC	5.41274	6.01141	CGC								Specificity	0.2	0.07048 to 0.4519
		20	5.01381	5.68395	CGC/AGC	4.77438	5.70703	CGC/AGC								Positive Predictive Value	0.4286	0.2447 to 0.6345
		21	4.87112	5.08529	CGC	2.93604	4.34937	CGC/AGC								Negative Predictive Value	0.1429	0.04981 to 0.3464
		22	4.11435	5.68328	CGC	3.05433	4.7042	CGC								Likelihood Ratio	0.4167
																Methods used to compute CIs
																Relative Risk	Koopman asymptotic score
																Attributable risk (P1 - P2)	Newcombe/Wilson with CC
																Odds ratio	Baptista-Pike
																Sensitivity, specificity, etc.	Wilson-Brown
