# Supplementary material for: A widely distributed metalloenzyme class enables gut microbial metabolism of host- and diet-derived catechols
Source: eLife. 2020 Feb 18;9:e50845. doi: 10.7554/eLife.50845 (PMC7028382; doi:10.7554/eLife.50845)
Supplement: Figure 3—source data 1. [file elife-50845-fig3-data1.xlsx]

## Sheet: Sheet1
		N.D = not detected
		G. pamelaeae + DOPAC			G. pamelaeae - DOPAC			Sterile control
Metabolite	1	2	3	1	2	3	1	2	3
m-HPAA (µM)	845.893	732.891	809.503	N.D	N.D	N.D	N.D	N.D	N.D
		E. lenta A2 + hydrocaffeic acid			E. lenta A2 - hydrocaffeic acid			Sterile control
	1	2	3	1	2	3	1	2	3
m-HPPA (µM)	956.9	957.133	927.27	N.D	N.D	N.D	N.D	N.D	N.D
		E. lenta A2 + (+)-catechin			E. lenta A2 - (+)-catechin			Sterile control
	1	2	3	1	2	3	1	2	3
Benzyl ether reduced, dehydroxylated catechin derivative mass peak area (exact mass: 275.0925)	9411341	1.55158e+07	13777387	N.D	N.D	N.D	N.D	N.D	N.D
