# Supplementary material for: A widely distributed metalloenzyme class enables gut microbial metabolism of host- and diet-derived catechols
Source: eLife. 2020 Feb 18;9:e50845. doi: 10.7554/eLife.50845 (PMC7028382; doi:10.7554/eLife.50845)
Supplement: Figure 4—source data 1. [file elife-50845-fig4-data1.xlsx]

## Sheet: Fig. 4A
		% conversion
		N.D = dehydroxylated product not detected
						ADDED TO LYSATE
			Vehicle			Dopamine			(+)-catechin			Hydrocaffeic acid			DOPAC
	Starter culture	1	2	3	1	2	3	1	2	3	1	2	3	1	2	3
	Vehicle	N.D	N.D	N.D	N.D	N.D	N.D	N.D	N.D	N.D	N.D	N.D	N.D	N.D	N.D	N.D
	Dopamine	N.D	N.D	N.D	100	100	100	N.D	N.D	N.D	N.D	N.D	N.D	N.D	N.D	N.D
	(+)-catechin	N.D	N.D	N.D	N.D	N.D	N.D	100	100	100	N.D	N.D	N.D	N.D	N.D	N.D
	Hydrocaffeic acid	N.D	N.D	N.D	N.D	N.D	N.D	N.D	N.D	N.D	100	100	100	N.D	N.D	N.D

## Sheet: Fig. 4B
						ADDED TO LYSATE
			Vehicle			Dopamine			(+)-catechin			Hydrocaffeic acid			DOPAC
	Starter culture	1	2	3	1	2	3	1	2	3	1	2	3	1	2	3
	Vehicle	N.D	N.D	N.D	N.D	N.D	N.D	N.D	N.D	N.D	N.D	N.D	N.D	N.D	N.D	N.D
	DOPAC	N.D	N.D	N.D	N.D	N.D	N.D	N.D	N.D	N.D	43.881	38.0008	44.8412	100	100	100

## Sheet: Fig. 4C
					% Dehydroxylation of hydrocaffeic acid			% Dehydroxylation of DOPAC			% Metabolism of (+)-catechin into benzyl ether reduced, dehydroxylated derivative
				Replicate 1	Replicate 2	Replicate 3	Replicate 1	Replicate 2	Replicate 3	Replicate 1	Replicate 2	Replicate 3
			E. lenta 1/3/56	81.3973	81.2583	64.3301	0	0	0	0	0	0
			G. pamelaeae 3C	59.7737	60.9824	58.1503	102.732	106.86	90.408	0	0	0
			E. lenta 14A	51.8085	56.6744	55.7536	0	0	0	91.4143	101.382	not analyzed
			E. lenta 11C	39.2449	43.3754	44.4373	0	0	0	97.486	102.514	not analyzed
			E. lenta 22C	44.4373	45.7073	47.1015	0	0	0	0	0	0
			E. lenta 28B	55.8239	55.8496	64.3345	0	0	0	88.5133	89.4315	94.4525
			Gordonibacteria sp. 28C	56.0873	57.7133	53.1419	30.7958	21.997	37.4974	0	0	0
			E. lenta DSM14644	53.7043	61.5161	69.3359	0	0	0	0	0	0
			E. lenta DSM16107	54.7796	54.1457	63.3517	0	0	0	0	0	0
			E. lenta DSM2243	73.2596	64.9558	74.5518	0	0	0	83.7873	80.7182	87.4747
			E. lenta VALENCIA	74.127	67.5852	63.385	0	0	0	0	0	0
			E. lenta AN5LG	0	0	0	0	0	0	0	0	0
			E. lenta MR#12	74.0873	72.9454	57.5515	0	0	0	0	0	0
			E. lenta 1-1-60A FAA	73.0914	80.411	55.398	0	0	0	92.3385	93.5292	92.7368
			E. lenta CCB/2 BHI2	59.7083	58.0388	not analyzed	0	0	0	24.8533	29.9928	39.1112
			E. lenta RC4/6F	50.1166	49.0842	46.8101	0	0	0	0	0	0
			E. lenta CC7/D52	45.8977	46.7765	49.5855	0	0	0	0	0	0
			E. lenta W1 BHI6	46.126	44.0957	47.3648	0	0	0	0	0	0
			Paraeggerthella RC2/2A	6.08896	1.99092	2.62945	4.8823	3.89994	3.78149	0	0	0
			E. lenta DSM11767	49.0135	60.1599	64.731	0	0	0	0	0	0
			E. lenta DSM 11863	69.0497	66.9298	75.9877	0	0	0	0	0	0
			E. lenta 32-6-I 6 FAA	76.4957	66.5648	67.0883	0	0	0	0	0	0
			E. lenta AB8#2	61.8729	61.9258	55.1556	0	0	0	0	0	0
			E. lenta AB12 #2	92.273	103.642	104.085	0	0	0	7.11563	8.33245	5.31853
			E. lenta CC8/6 D5 4	91.9323	97.1944	102.928	0	0	0	0	0	0
			E. lenta A2*	100	100	100	0	0	0	100	100	100
			sterile control	0	0	0	0	0	0	0	0	0
			All data were normalized to the highest metabolizer among the set, which corresponded to quantitative conversion
			*E. lenta A2 DOPAC, hydrocaffefic acid, and (+)-catechin metabolism data from independent set of experiments

## Sheet: Fig 4D
	Extracted LC-MS/MS ion chromatograms for detection of h m-hydroxyphenylpropionic acid (m-HPPA) (MRM m/z 165->121)										Extracted LC-MS/MS ion chromatograms for detection of hydrocaffeic acid (MRM m/z 181->137)
	#Point	X(Minutes)	buffer + HCA	buffer + mHPPA	Reaction -HCA	Full reaction	Full reaction + O2				#Point	X(Minutes)	buffer + HCA	buffer + mHPPA	Reaction -HCA	Full reaction	Full reaction + O2
	0	1	0	0	0	1	0				0	1	12	12	12	11	11
	1	1	0	0	0	0	0				1	1	3	3	3	3	3
	2	1	8	0	0	1	0				2	1	1	0	0	6	0
	3	1.1	21	4	0	14	11				3	1.1	3	7	2	20	8
	4	1.1	25	20	10	24	28				4	1.1	9	28	22	24	29
	5	1.1	17	30	15	27	38				5	1.1	9	43	40	24	40
	6	1.1	12	28	31	29	45				6	1.1	10	55	57	16	54
	7	1.1	14	36	48	30	42				7	1.1	12	67	60	20	67
	8	1.1	26	42	67	31	45				8	1.1	19	85	67	16	81
	9	1.2	26	48	55	27	52				9	1.2	19	91	65	20	86
	10	1.2	21	41	45	26	60				10	1.2	25	93	55	23	88
	11	1.2	11	38	37	30	50				11	1.2	26	88	64	21	88
	12	1.2	25	40	38	32	41				12	1.2	23	87	60	16	69
	13	1.2	41	41	23	33	35				13	1.2	11	87	72	13	71
	14	1.2	41	41	30	29	36				14	1.2	5	91	60	21	77
	15	1.3	35	32	44	30	30				15	1.3	9	88	72	26	90
	16	1.3	31	25	48	32	29				16	1.3	16	75	73	21	95
	17	1.3	28	37	32	37	38				17	1.3	19	78	64	18	91
	18	1.3	24	49	17	38	42				18	1.3	24	74	42	20	76
	19	1.3	23	53	19	37	44				19	1.3	19	87	26	24	56
	20	1.3	28	41	23	27	37				20	1.3	19	82	34	25	57
	21	1.4	24	34	35	19	32				21	1.4	13	80	40	30	67
	22	1.4	24	44	33	18	27				22	1.4	16	72	44	34	74
	23	1.4	38	42	32	22	17				23	1.4	15	81	62	40	83
	24	1.4	51	32	27	29	20				24	1.4	14	110	72	30	73
	25	1.4	46	22	30	28	25				25	1.4	19	114	63	28	71
	26	1.4	32	27	34	29	38				26	1.4	25	100	53	23	68
	27	1.5	25	31	33	41	35				27	1.5	26	76	61	22	98
	28	1.5	29	28	40	47	36				28	1.5	15	84	68	22	111
	29	1.5	24	29	42	51	33				29	1.5	12	93	70	26	114
	30	1.5	24	32	45	41	39				30	1.5	23	86	62	40	104
	31	1.5	34	43	33	39	42				31	1.5	42	86	67	36	110
	32	1.6	51	49	25	29	42				32	1.6	50	85	69	35	126
	33	1.6	51	41	20	30	47				33	1.6	43	89	89	29	124
	34	1.6	36	43	25	30	46				34	1.6	32	106	88	28	118
	35	1.6	15	40	34	34	49				35	1.6	30	108	78	38	100
	36	1.6	4	47	43	40	38				36	1.6	35	105	67	44	90
	37	1.6	9	42	46	40	39				37	1.6	33	77	62	47	92
	38	1.7	21	42	40	40	35				38	1.7	39	77	78	35	96
	39	1.7	36	38	40	30	37				39	1.7	38	79	87	41	104
	40	1.7	36	35	42	32	37				40	1.7	44	89	96	45	108
	41	1.7	27	30	46	31	41				41	1.7	34	114	90	41	103
	42	1.7	15	27	45	46	42				42	1.7	31	123	81	30	94
	43	1.7	15	26	47	37	34				43	1.7	22	121	81	20	89
	44	1.8	14	31	39	27	26				44	1.8	17	108	76	13	113
	45	1.8	11	27	35	14	19				45	1.8	14	95	79	11	110
	46	1.8	3	22	35	33	13				46	1.8	6	91	70	11	92
	47	1.8	5	15	32	41	21				47	1.8	2	84	60	11	57
	48	1.8	7	11	19	45	20				48	1.8	0	79	57	5	62
	49	1.8	7	6	5	27	16				49	1.8	0	58	50	1	56
	50	1.9	2	4	3	22	4				50	1.9	0	43	48	0	56
	51	1.9	0	0	5	11	2				51	1.9	0	36	37	0	36
	52	1.9	0	0	4	10	1				52	1.9	0	28	30	0	30
	53	1.9	0	0	3	5	3				53	1.9	0	18	22	0	26
	54	1.9	0	0	2	5	6				54	1.9	0	15	18	0	23
	55	1.9	0	0	4	3	9				55	1.9	0	12	22	0	20
	56	2	0	0	7	1	8				56	2	0	9	28	0	12
	57	2	0	0	6	0	4				57	2	0	3	25	0	11
	58	2	0	0	3	0	0				58	2	0	3	16	0	11
	59	2	0	0	0	0	0				59	2	0	4	11	0	12
	60	2	0	2	0	0	0				60	2	0	3	9	0	10
	61	2	0	5	1	0	0				61	2	0	3	4	0	7
	62	2.1	0	5	5	1	0				62	2.1	0	0	0	0	3
	63	2.1	0	2	5	4	0				63	2.1	0	0	4	0	0
	64	2.1	0	0	3	4	0				64	2.1	0	0	7	0	0
	65	2.1	0	0	5	1	0				65	2.1	0	1	12	0	3
	66	2.1	0	0	8	1	0				66	2.1	0	7	8	0	3
	67	2.1	0	0	9	2	0				67	2.1	0	10	8	0	4
	68	2.2	0	0	4	2	0				68	2.2	0	8	10	0	7
	69	2.2	0	0	1	0	0				69	2.2	0	6	13	0	11
	70	2.2	0	0	0	0	0				70	2.2	0	7	8	0	9
	71	2.2	0	0	0	1	0				71	2.2	0	7	2	0	3
	72	2.2	0	0	0	4	0				72	2.2	0	2	0	0	0
	73	2.2	0	0	0	4	0				73	2.2	0	0	0	0	0
	74	2.3	0	0	1	2	0				74	2.3	0	0	4	0	0
	75	2.3	0	0	1	0	0				75	2.3	0	0	9	0	0
	76	2.3	0	0	0	0	1				76	2.3	0	0	9	0	0
	77	2.3	0	0	0	0	2				77	2.3	0	3	4	0	0
	78	2.3	0	0	0	0	2				78	2.3	0	6	0	0	0
	79	2.3	0	0	0	0	3				79	2.3	0	6	1	0	0
	80	2.4	0	0	0	0	2				80	2.4	0	3	3	0	0
	81	2.4	0	0	0	0	1				81	2.4	0	2	5	0	1
	82	2.4	0	0	0	0	0				82	2.4	0	2	6	0	3
	83	2.4	0	0	2	0	0				83	2.4	0	0	8	0	6
	84	2.4	0	0	3	0	2				84	2.4	0	1	12	0	9
	85	2.5	0	0	3	0	4				85	2.5	0	5	12	0	18
	86	2.5	0	0	3	0	4				86	2.5	0	10	16	0	24
	87	2.5	0	0	4	0	2				87	2.5	0	12	22	0	23
	88	2.5	0	0	5	0	2				88	2.5	0	18	31	0	23
	89	2.5	0	0	3	0	3				89	2.5	0	19	25	0	32
	90	2.5	0	0	0	0	3				90	2.5	0	24	23	0	40
	91	2.6	0	0	1	0	2				91	2.6	0	31	27	0	40
	92	2.6	0	0	3	0	3				92	2.6	0	48	44	0	51
	93	2.6	0	0	8	0	4				93	2.6	0	63	48	2	48
	94	2.6	0	0	8	0	7				94	2.6	0	61	47	4	44
	95	2.6	0	5	9	0	9				95	2.6	0	62	39	5	31
	96	2.6	0	8	10	0	16				96	2.6	0	50	37	6	38
	97	2.7	0	10	17	0	16				97	2.7	0	45	39	5	54
	98	2.7	0	7	15	2	15				98	2.7	0	48	41	5	68
	99	2.7	0	7	16	4	7				99	2.7	0	62	35	4	84
	100	2.7	0	9	9	7	11				100	2.7	0	64	27	3	68
	101	2.7	1	14	8	4	15				101	2.7	0	55	37	1	51
	102	2.7	2	15	12	4	16				102	2.7	0	55	53	2	39
	103	2.8	4	11	18	7	18				103	2.8	3	55	51	2	47
	104	2.8	2	6	26	14	22				104	2.8	10	52	58	6	52
	105	2.8	1	7	26	12	25				105	2.8	22	42	62	10	61
	106	2.8	1	6	24	7	16				106	2.8	45	48	79	13	68
	107	2.8	5	4	19	2	16				107	2.8	79	46	63	10	64
	108	2.8	6	3	13	5	21				108	2.8	139	52	70	6	55
	109	2.9	9	8	20	9	28				109	2.9	194	50	68	3	65
	110	2.9	11	10	19	12	22				110	2.9	290	62	91	1	77
	111	2.9	11	16	21	19	19				111	2.9	428	65	86	3	78
	112	2.9	4	17	13	17	15				112	2.9	671	70	88	7	66
	113	2.9	0	16	16	15	13				113	2.9	977	60	71	9	62
	114	2.9	0	21	20	7	11				114	2.9	1409	78	70	16	61
	115	3	0	24	29	6	19				115	3	1941	92	67	24	71
	116	3	0	23	33	5	29				116	3	2613	95	75	27	101
	117	3	0	15	30	8	32				117	3	3501	76	75	23	125
	118	3	0	16	23	9	35				118	3	4289	68	68	17	136
	119	3	0	28	14	18	31				119	3	5214	64	72	16	119
	120	3	0	27	13	21	32				120	3	5891	73	83	16	120
	121	3.1	0	29	15	22	29				121	3.1	6384	75	94	22	131
	122	3.1	0	20	21	21	32				122	3.1	6286	91	95	26	133
	123	3.1	0	27	26	23	28				123	3.1	6070	89	88	41	133
	124	3.1	0	30	32	22	27				124	3.1	5812	101	92	50	160
	125	3.1	0	35	46	21	27				125	3.1	5301	99	83	47	194
	126	3.1	3	48	44	25	27				126	3.1	4780	97	78	30	272
	127	3.2	5	48	40	35	20				127	3.2	4153	91	66	34	378
	128	3.2	9	44	34	38	24				128	3.2	3667	110	89	36	512
	129	3.2	12	32	36	37	34				129	3.2	3094	102	110	33	642
	130	3.2	15	36	41	35	42				130	3.2	2826	92	103	22	764
	131	3.2	19	50	46	33	38				131	3.2	2678	82	87	24	962
	132	3.2	21	56	41	30	31				132	3.2	2548	92	76	33	1237
	133	3.3	29	55	30	25	31				133	3.3	2348	94	99	27	1509
	134	3.3	25	40	32	20	32				134	3.3	2208	84	99	23	1787
	135	3.3	20	32	37	26	32				135	3.3	2031	122	113	16	1981
	136	3.3	14	23	49	34	26				136	3.3	1834	130	109	17	2224
	137	3.3	22	25	41	53	18				137	3.3	1639	132	133	17	2366
	138	3.4	30	29	44	49	11				138	3.4	1596	113	121	19	2497
	139	3.4	30	38	33	41	8				139	3.4	1525	117	107	24	2594
	140	3.4	30	35	29	30	13				140	3.4	1446	107	97	25	2587
	141	3.4	25	37	22	27	17				141	3.4	1337	98	116	32	2524
	142	3.4	21	46	19	32	22				142	3.4	1355	90	119	30	2399
	143	3.4	12	51	28	34	19				143	3.4	1324	92	115	30	2299
	144	3.5	16	46	39	30	20				144	3.5	1299	86	103	27	2112
	145	3.5	20	39	43	21	19				145	3.5	1203	119	93	31	1939
	146	3.5	19	33	41	18	20				146	3.5	1088	127	102	21	1715
	147	3.5	23	33	35	21	20				147	3.5	1008	120	108	17	1585
	148	3.5	26	31	43	16	16				148	3.5	948	88	105	13	1392
	149	3.5	28	42	41	21	20				149	3.5	944	100	104	20	1221
	150	3.6	30	46	43	23	23				150	3.6	884	118	111	23	1054
	151	3.6	30	41	36	40	34				151	3.6	864	118	124	29	943
	152	3.6	33	29	40	38	36				152	3.6	818	116	130	27	908
	153	3.6	26	17	46	46	33				153	3.6	767	114	121	33	802
	154	3.6	24	23	47	45	32				154	3.6	703	147	114	48	759
	155	3.6	17	29	44	53	46				155	3.6	638	145	94	62	696
	156	3.7	14	43	39	63	48				156	3.7	649	168	108	66	665
	157	3.7	16	43	48	55	39				157	3.7	666	140	96	63	576
	158	3.7	16	41	50	46	34				158	3.7	647	128	111	62	537
	159	3.7	18	43	43	39	44				159	3.7	630	110	98	57	478
	160	3.7	26	39	37	48	51				160	3.7	559	127	91	61	470
	161	3.7	39	29	37	39	40				161	3.7	561	126	97	68	438
	162	3.8	45	18	37	30	37				162	3.8	521	114	123	74	418
	163	3.8	42	29	41	36	30				163	3.8	606	94	139	90	407
	164	3.8	34	48	42	55	33				164	3.8	570	91	129	89	390
	165	3.8	22	56	42	70	34				165	3.8	513	78	124	80	391
	166	3.8	17	57	35	86	45				166	3.8	467	86	109	53	365
	167	3.8	14	79	31	134	46				167	3.8	470	100	100	50	350
	168	3.9	28	127	48	250	46				168	3.9	508	112	87	45	371
	169	3.9	34	263	50	513	38				169	3.9	494	99	76	42	357
	170	3.9	36	538	61	1078	33				170	3.9	502	76	81	39	343
	171	3.9	36	953	38	1879	22				171	3.9	475	89	87	43	301
	172	3.9	37	1607	48	3407	31				172	3.9	438	101	95	64	302
	173	3.9	36	2552	45	5806	35				173	3.9	437	107	95	76	297
	174	4	37	3917	43	9497	41				174	4	435	81	107	79	297
	175	4	44	5501	27	13665	37				175	4	488	74	112	74	291
	176	4	41	7325	35	18509	35				176	4	481	78	109	74	285
	177	4	36	9404	50	23371	38				177	4	462	80	94	81	280
	178	4	25	11459	59	28018	40				178	4	402	76	91	83	282
	179	4	25	13037	53	31360	45				179	4	377	57	88	100	288
	180	4.1	37	14260	44	33770	39				180	4.1	380	58	100	97	280
	181	4.1	60	15311	59	34797	39				181	4.1	359	59	97	75	253
	182	4.1	68	15986	66	36117	39				182	4.1	347	64	102	73	218
	183	4.1	74	16211	59	36837	38				183	4.1	318	65	98	80	202
	184	4.1	73	16258	33	37318	44				184	4.1	330	54	113	93	217
	185	4.1	63	16229	38	36555	52				185	4.1	342	53	103	85	235
	186	4.2	39	15989	48	35517	63				186	4.2	367	50	89	95	262
	187	4.2	33	15370	59	34435	50				187	4.2	373	66	78	111	244
	188	4.2	32	14429	58	33178	45				188	4.2	367	66	85	134	232
	189	4.2	32	13448	60	31871	39				189	4.2	352	62	92	145	210
	190	4.2	27	12904	54	30215	48				190	4.2	313	52	95	143	232
	191	4.2	38	12444	55	28360	47				191	4.2	308	47	97	112	226
	192	4.3	49	11590	62	26303	40				192	4.3	289	42	91	104	222
	193	4.3	61	10414	63	24416	43				193	4.3	273	51	84	96	201
	194	4.3	56	9306	56	22261	45				194	4.3	237	62	81	113	203
	195	4.3	50	8345	43	19992	42				195	4.3	272	78	79	98	186
	196	4.3	40	7307	54	17766	36				196	4.3	307	73	63	90	179
	197	4.4	43	6436	52	16008	33				197	4.4	311	78	77	97	180
	198	4.4	50	5375	52	14320	34				198	4.4	301	68	89	122	197
	199	4.4	48	4582	35	12429	26				199	4.4	294	80	137	127	199
	200	4.4	34	3869	37	10570	31				200	4.4	308	84	144	127	214
	201	4.4	18	3451	34	8863	38				201	4.4	295	83	128	131	190
	202	4.4	20	3038	29	7430	48				202	4.4	271	72	83	143	187
	203	4.5	29	2590	21	6166	41				203	4.5	234	67	93	128	168
	204	4.5	43	2154	16	5151	39				204	4.5	233	98	121	122	189
	205	4.5	50	1727	25	4250	42				205	4.5	269	113	141	136	192
	206	4.5	46	1491	37	3545	47				206	4.5	259	118	121	171	188
	207	4.5	33	1381	43	3036	45				207	4.5	252	113	116	182	182
	208	4.5	35	1264	41	2597	33				208	4.5	220	104	106	159	174
	209	4.6	39	1135	32	2289	40				209	4.6	235	116	99	117	165
	210	4.6	31	1000	32	1954	43				210	4.6	215	113	79	94	177
	211	4.6	23	909	46	1669	46				211	4.6	219	125	74	109	180
	212	4.6	25	825	56	1415	48				212	4.6	205	99	85	109	193
	213	4.6	30	758	61	1237	45				213	4.6	197	91	113	110	185
	214	4.6	27	698	55	1096	55				214	4.6	186	84	126	107	166
	215	4.7	24	674	48	915	49				215	4.7	194	100	143	124	143
	216	4.7	29	626	36	863	52				216	4.7	206	111	134	147	154
	217	4.7	30	579	21	786	35				217	4.7	197	110	119	160	186
	218	4.7	25	527	17	744	35				218	4.7	189	112	100	158	211
	219	4.7	19	477	19	637	36				219	4.7	166	103	91	134	204
	220	4.7	19	439	25	617	43				220	4.7	175	111	94	113	180
	221	4.8	28	410	32	568	39				221	4.8	162	103	95	123	151
	222	4.8	33	422	30	566	31				222	4.8	166	105	110	129	146
	223	4.8	35	431	32	517	30				223	4.8	148	95	122	129	158
	224	4.8	29	407	31	455	32				224	4.8	126	97	121	123	161
	225	4.8	25	390	38	391	34				225	4.8	108	103	117	142	128
	226	4.8	18	358	41	351	36				226	4.8	106	102	116	156	129
	227	4.9	32	380	41	323	30				227	4.9	143	107	104	163	138
	228	4.9	37	383	40	303	29				228	4.9	160	107	87	155	166
	229	4.9	50	391	31	279	23				229	4.9	165	107	78	143	162
	230	4.9	40	362	29	274	32				230	4.9	154	116	80	118	156
	231	4.9	36	309	27	266	33				231	4.9	157	136	85	114	143
	232	4.9	20	279	27	265	46				232	4.9	148	150	76	141	142
	233	5	17	277	25	219	45				233	5	136	139	91	164	144
	234	5	21	290	28	208	46				234	5	131	126	107	137	154
	235	5	22	310	37	225	41				235	5	142	104	117	117	152
	236	5	20	310	43	243	42				236	5	133	97	100	102	152
	237	5	15	300	38	208	43				237	5	127	114	88	107	139
	238	5	16	311	31	197	38				238	5	109	130	100	94	125
	239	5.1	12	306	36	181	38				239	5.1	97	138	122	95	119
	240	5.1	8	304	43	170	29				240	5.1	80	126	126	108	120
	241	5.1	7	240	50	140	24				241	5.1	83	110	130	118	149
	242	5.1	6	210	48	99	18				242	5.1	87	99	129	108	162
	243	5.1	11	197	42	62	20				243	5.1	116	97	140	88	192
	244	5.1	13	212	42	50	22				244	5.1	109	88	126	93	202
	245	5.2	19	211	38	48	25				245	5.2	109	88	125	114	231
	246	5.2	19	189	42	35	31				246	5.2	85	106	112	127	207
	247	5.2	22	184	34	8	47				247	5.2	111	113	122	114	199
	248	5.2	18	200	26	2	41				248	5.2	96	101	108	109	161
	249	5.2	14	198	26	2	34				249	5.2	97	86	109	94	161
	250	5.3	22	195	29	3	22				250	5.3	82	84	103	99	151
	251	5.3	29	172	34	4	26				251	5.3	84	101	120	101	146
	252	5.3	30	176	41	5	30				252	5.3	64	117	104	103	131
	253	5.3	16	152	36	4	45				253	5.3	60	131	98	97	110
	254	5.3	9	135	33	5	54				254	5.3	74	102	96	103	119
	255	5.3	6	126	30	9	56				255	5.3	95	99	104	102	128
	256	5.4	4	140	32	17	46				256	5.4	96	84	100	99	130
	257	5.4	3	174	26	17	44				257	5.4	88	91	85	89	139
	258	5.4	2	163	14	12	43				258	5.4	79	79	82	113	134
	259	5.4	2	118	10	5	42				259	5.4	78	72	81	101	132
	260	5.4	2	59	8	10	36				260	5.4	81	47	60	97	111
	261	5.4	4	29	6	19	30				261	5.4	75	21	29	83	104
	262	5.5	10	25	3	19	38				262	5.5	59	7	2	87	94
	263	5.5	16	20	1	10	44				263	5.5	56	2	0	79	70
	264	5.5	21	13	0	5	40				264	5.5	51	0	0	92	38
	265	5.5	18	6	0	10	29				265	5.5	59	0	0	94	20
	266	5.5	17	2	0	9	18				266	5.5	52	0	0	87	19
	267	5.5	19	0	0	9	16				267	5.5	60	0	0	79	19
	268	5.6	14	0	0	8	9				268	5.6	51	0	0	71	12
	269	5.6	8	0	0	7	6				269	5.6	47	0	0	59	16
	270	5.6	5	3	0	5	0				270	5.6	48	0	0	55	14
	271	5.6	11	4	0	8	0				271	5.6	45	0	0	67	15
	272	5.6	10	4	0	14	0				272	5.6	44	0	0	69	8
	273	5.6	8	1	0	12	1				273	5.6	51	0	0	63	5
	274	5.7	8	0	0	11	3				274	5.7	54	0	0	56	0
	275	5.7	12	0	0	13	3				275	5.7	41	1	0	45	0
	276	5.7	12	0	0	12	1				276	5.7	22	1	0	47	3
	277	5.7	9	0	0	6	0				277	5.7	29	0	0	50	3
	278	5.7	10	0	0	0	0				278	5.7	30	0	0	53	1
	279	5.7	9	3	0	3	0				279	5.7	29	0	0	34	0
	280	5.8	7	4	0	6	0				280	5.8	17	3	0	36	0
	281	5.8	3	4	0	6	0				281	5.8	22	3	0	45	0
	282	5.8	3	1	0	1	0				282	5.8	25	2	0	52	0
	283	5.8	5	0	0	4	0				283	5.8	30	0	3	49	0
	284	5.8	3	1	0	7	0				284	5.8	30	0	5	41	3
	285	5.8	1	3	0	8	0				285	5.8	31	0	5	42	8
	286	5.9	0	5	0	6	0				286	5.9	35	0	1	50	12
	287	5.9	0	5	0	5	0				287	5.9	43	1	1	57	10
	288	5.9	0	5	0	6	0				288	5.9	52	3	2	49	5
	289	5.9	0	3	0	8	0				289	5.9	48	3	3	44	2
	290	5.9	2	1	0	10	0				290	5.9	39	1	4	45	0
	291	5.9	6	0	0	12	0				291	5.9	45	0	3	49	0
	292	6	8	0	0	10	0				292	6	44	0	1	46	0
	293	6	6	0	0	7	0				293	6	23	0	0	54	0
	294	6	8	0	0	7	0				294	6	51	0	0	45	0

## Sheet: Fig. 4E
		Replicate	% dehydroxylation
	ENZ + hydrocaffeic acid	1	37.7458
	ENZ + hydrocaffeic acid	2	35.2204
	ENZ + hydrocaffeic acid	3	22.8887
	ENZ + hydrocaffeic acid + O2	1	0
	ENZ + hydrocaffeic acid + O2	2	0
	ENZ + hydrocaffeic acid + O2	3	0
	ENZ + Dopamine	1	0
	ENZ + Dopamine	2	0
	ENZ + Dopamine	3	0
	ENZ + DOPAC	1	0
	ENZ + DOPAC	2	0
	ENZ + DOPAC	3	0
	ENZ + (+)-catechin	1	0
	ENZ + (+)-catechin	2	0
	ENZ + (+)-catechin	3	0
