# Supplementary material for: A widely distributed metalloenzyme class enables gut microbial metabolism of host- and diet-derived catechols
Source: eLife. 2020 Feb 18;9:e50845. doi: 10.7554/eLife.50845 (PMC7028382; doi:10.7554/eLife.50845)
Supplement: Figure 5—source data 1. [file elife-50845-fig5-data1.xlsx]

## Sheet: Fig 5B-D
					% Dehydroxylation, d4-dopamine (Fig. 5B)
Sample	Sample 1	Sample 2	Sample 3	Sample 4	Sample 5	Sample 6	Sample 7	Sample 8	Sample 9	Sample 10	Sample 11	Sample 12	E. lenta A2	Sterile control
Replicate 1	68.4463	57.3139	80.3687	0	71.391	89.0591	0	93.153	79.5068	59.7558	109.097	0	99.8324	0
Replicate 2	74.6229	84.3189	103.424	22.193	76.8494	81.6615	0	71.7501	67.6562	72.971	87.0481	0	96.6723	0
Replicate 3	74.1202	0	90.1365	0	71.0318	90.9265	0	63.8497	78.214	85.0371	96.8159	0	103.495	0
Average	72.3965	47.2109	91.3096	7.39765	73.0907	87.2157	0	76.2509	75.1257	72.588	97.6538	0	100	0
Metabolizer?	YES	YES	YES	YES	YES	YES	NO	YES	YES	YES	YES	NO
					% Dehydroxylation, hydrocaffeic acid (Fig. 5C)
Sample	Sample 1	Sample 2	Sample 3	Sample 4	Sample 5	Sample 6	Sample 7	Sample 8	Sample 9	Sample 10	Sample 11	Sample 12	E. lenta A2	Sterile control
Replicate 1	58.1914	42.2486	62.9649	58.0057	56.8265	63.2469	0	55.291	50.0631	53.0607	62.7466	50.4609	109.115	0
Replicate 2	59.1717	64.0867	71.1153	66.9181	72.0815	86.0105	0	71.4194	94.2149	63.703	81.1689	71.6192	94.6604	0
Replicate 3	56.7177	61.4047	74.0882	64.115	64.9442	79.9711	0	65.5249	73.5631	68.5173	68.0037	68.5411	96.2242	0
Average	58.0269	55.9133	69.3895	63.0129	64.6174	76.4095	0	64.0784	72.6137	61.7603	70.6397	63.5404	100	0
Metabolizer?	YES	YES	YES	YES	YES	YES	NO	YES	YES	YES	YES	YES
					% Dehydroxylation, d5-DOPAC (Fig. 5D)
Sample	Sample 1	Sample 2	Sample 3	Sample 4	Sample 5	Sample 6	Sample 7	Sample 8	Sample 9	Sample 10	Sample 11	Sample 12	G. pamelaeae 3C	Sterile control
Replicate 1	10.6741	2.41655	13.1848	27.5739	18.5289	0	0	48.0224	4.84312	49.9751	5.19178	0	123.028	0
Replicate 2	30.9152	0	13.3371	34.1243	11.4195	0	0	57.7427	0	0	0	0	89.4635	0
Replicate 3	56.9933	0	39.0706	36.0639	15.0083	0	0	75.1696	21.3913	59.4119	4.8301	0	87.5088	0
Average	32.8609	0.805517	21.8642	32.5874	14.9856	0	0	60.3116	8.7448	36.4623	3.34062	0	100	0
Metabolizer?	YES	YES	YES	YES	YES	NO	NO	YES	YES	YES	YES	NO

## Sheet: Fig 5E-F
	Data for Figure 5E and 5F: dodh log(copy number)
Sample	Sample 1	Sample 2	Sample 3	Sample 4	Sample 5	Sample 6	Sample 7	Sample 8	Sample 9	Sample 10	Sample 11	Sample 12
Replicate 1	4.06687	4.34363	4.47343	4.65746	4.25223	2.043	1.90903	4.95177	3.73537	4.53082	4.14542	2.79659
Replicate 2	4.23229	2.32545	4.31511	4.79626	4.05346	2.28912	2.06878	4.98492	3.33537	1.99479	4.34777	2.42824
Replicate 3	5.11196	2.48335	4.77087	4.65571	4.18484	2.3592	2.09301	5.69656	4.7509	5.01664	4.4017	2.29684
Average	4.47037	3.05081	4.5198	4.70314	4.16351	2.23044	2.02361	5.21109	3.94055	3.84742	4.2983	2.50722
Metabolizer?	YES	YES	YES	YES	YES	NO	NO	YES	YES	YES	YES	NO
	Statistics for Figure 5E (comparing log copy number of dodh between metabolizing and non-metabolizing samples):
	Figure 5E: Unpaired t test
	P value	0.0003
	P value summary	***
	Significantly different (P < 0.05)?	Yes
	One- or two-tailed P value?	Two-tailed
	t, df	t=5.388, df=10
	How big is the difference?
	Mean of column A	4.245
	Mean of column B	2.254
	Difference between means (B - A) ± SEM	-1.991 ± 0.3696
	95% confidence interval	-2.815 to -1.168
	R squared (eta squared)	0.7438
	F test to compare variances
	F, DFn, Dfd	6.275, 8, 2
	P value	0.2893
	P value summary	ns
	Significantly different (P < 0.05)?	No
	Data analyzed
	Sample size, column A	9
	Sample size, column B	3
	Statistics for Figure 5F (correlation between average log copy number of dodh and % dehydroxylation)
	Figure 5F: Pearson r
	r	0.7275
	95% confidence interval	0.1227 to 0.9383
	R squared	0.5293
	P value
	P (two-tailed)	0.0263
	P value summary	*
	Significant? (alpha = 0.05)	Yes
	Number of XY Pairs	9

## Sheet: (+)-catechin ex vivo data
			% Dehydroxylation
		Sample	Sample 1	Sample 2	Sample 3	Sample 4	Sample 5	Sample 6	Sample 7	Sample 8	Sample 9	Sample 10	Sample 11	Sample 12	E. lenta A2	Sterile control
		Replicate 1	0	0.140965	0.0899963	0.297949	0	67.7064	0	3.33802	0	0.122034	0.289794	0	107.178	0
		Replicate 2	0	0	0	0	0	0	0	0	0	0	0	0	96.9354	0
		Replicate 3	0	0	100	0	0	100	0	0	0	0	0	0	103.495	0
			% (+)-catechin remaining
		Sample	Sample 1	Sample 2	Sample 3	Sample 4	Sample 5	Sample 6	Sample 7	Sample 8	Sample 9	Sample 10	Sample 11	Sample 12	E. lenta A2	Sterile control
		Replicate 1	0	0	0	0	0	0	0	0	0	0	0	0	0	102.041
		Replicate 2	0	0	0	0	0	0	0	0	0	1.03589	1.27639	0	0	99.3087
		Replicate 3	0	0	0	0	0	0	0	0	0	0	0	0	0	98.6502
