# Supplementary material for: A widely distributed metalloenzyme class enables gut microbial metabolism of host- and diet-derived catechols
Source: eLife. 2020 Feb 18;9:e50845. doi: 10.7554/eLife.50845 (PMC7028382; doi:10.7554/eLife.50845)
Supplement: Figure 8—source data 1. [file elife-50845-fig8-data1.xlsx]

## Sheet: Sheet1
		Empty well = sample was not analyzed by LC-MS/MS
		Data display mass peak areas of selected metabolites of interest
				GUINEA PIG	SHEEP	MOUSE	DOG	COW	ALPACA	BISON	RAT	WOLF	PIG	RABBIT	FOX
		Metabolite	Individual	1	2	3	4	5	6	7	8	9	10	11	12	Sterile control
		m-Tyramine	1								4068961	1554082	1824039		2829338	0
		m-Tyramine	2													0
		m-Tyramine	3				2569312									0
		Dehydroxylated, benzyl ether reducted catechin	1								2048475	26575	1824039		874773	0
		Dehydroxylated, benzyl ether reducted catechin	2		0								536718			0
		Dehydroxylated, benzyl ether reducted catechin	3								347946		2072603		147406	0
		m-HPAA	1		0	0					784313	0				0
		m-HPAA	2													0
		m-HPAA	3										0			0
		m-HPPA	1		0	0					1798990	1390593	1539696	0	1376133	0
		m-HPPA	2					0	1593315	0	1326407			0		0
		m-HPPA	3	565595			931208				975652		1649869	0		0
