# Supplementary material for: A widely distributed metalloenzyme class enables gut microbial metabolism of host- and diet-derived catechols
Source: eLife. 2020 Feb 18;9:e50845. doi: 10.7554/eLife.50845 (PMC7028382; doi:10.7554/eLife.50845)
Supplement: Supplementary file 1. — Supplementary file 1a. Physiologically relevant catechol substrates used in assays with natively purified dopamine dehydroxylase from E. lenta A2. Supplementary file 1b. Commercially available and synthesized dopamine analogs used in assays with natively purified dopamine dehydroxylase from E. lenta A2. Supplementary file 1c. Differentially expressed genes upon exposure of Eggerthella lenta A2 to 0.5 mM DL-norepinephrine relative to vehicle (>|2|-fold difference, FDR < 0.1). The dopamine dehydroxylase (dadh) in E. lenta A2 is highlighted in red. Data are from n = 3 bacterial cultures for each condition. Supplementary file 1d. Bacterial strains used in this study Supplementary file 1e. Catechol substrates used in screen of gut Actinobacteria for catechol metabolism. 3,4-DHMA stands for 3,4-dihydroxymandelic acid. 2,3-DHBA stands for 2,3-dihydroxybenzoic acid. [file elife-50845-supp1.xlsx]

## Sheet: Supplementary file 1a
Name	Structure	Natural origin	Catalog number
Caffeic acid		Plant	Millipore Sigma, catalog# C0625-2G
Hydrocaffeic acid		Plant	Millipore Sigma, catalog# 102601-10G
(-)-epicatechin		Plant	Millipore Sigma, catalog# E1753-1G
(+)-catechin		Plant	Millimore Sigma, catalog# C1251-5G
3,4-dihydroxybenzoic acid		Plant	Millipore Sigma, catalog# 37580-25G-F
3,4-dihydroxyphenylacetic acid		Host	Millipore Sigma, catalog# 850217-1G
Ellagic acid		Plant	Millipore Sigma, catalog# E2250-1G
D-L-epinephrine		Host	Sigma Aldrich, catalog# E4642-5G
D-L-norepinephrine		Host	Millipore Sigma, catalog# A7256-1G
Dopamine		Host	Sigma-Aldrich, catalog# PHR1090-1G

## Sheet: Supplementary file 1b
Analog#	Name	Structure	Catalog number
	Dopamine		Sigma-Aldrich, catalog# PHR1090-1G
1	p-tyramine		Sigma Aldrich, catalog# T2879-1G
2	3-aminotyramine		Synthesized in our laboratory
3	3-methoxytyramine		Sigma Aldrich, catalog# M4251-100MG
4	2,3-dihydroxyphenylethylamine		Synthesized in our laboratory
5	4,6-dihydroxyphenylethylamine		Enamine, catalog # EN300-65185
6	1,4-dihydroxyphenylethylamine		Synthesized in our laboratory
7	3,5-dihydroxyphenylethylamine		Synthesized in our laboratory
8	Hydroxytyrosol		Synthesized in our laboratory
9	3,4-dihydroxybenzylamine		Sigma Aldrich, catalog# 858781-250MG
10	N-methyldopamine		Santa Cruz, catalog# sc-358430A
11	2-hydroxydopamine		Synthesized in our laboratory
12	6-hydroxydopamine		Sigma Aldrich, catalog #H4381-100MG
13	5-hydroxydopamine		Sigma Aldrich, catalog# 151564-100G
14	2,3,5-trihydroxyphenylethylamine		Synthesized in our laboratory

## Sheet: Supplementary file 1c
	Locus tag	Annotation	log2FoldChange	p-value (FDR<0.1)
	Elenta-A2_00671	fumarate_reductase/succinate_dehydrogenase	11.41	1.08e-25
	Elenta-A2_00535	molydopterin_dinucleotide-binding_region (dadh)	9.6	6.64e-13
	Elenta-A2_00533	hypothetical_protein	7.14	5.34e-13
	Elenta-A2_00999	hypothetical_protein	2.2	2.37e-13
	Elenta-A2_01000	hypothetical_protein	2.19	1.36e-15
	Elenta-A2_00997	DBCCT_transporter	2.15	3.73e-10
	Elenta-A2_00998	Creatininase	2.01	5.47e-06
	Elenta-A2_00996	General_substrate_transporter	1.61	8.79e-07
	Elenta-A2_01462	hypothetical_protein	1.43	3.08e-09
	Elenta-A2_01463	4Fe-4S_ferredoxin_iron-sulfur_binding_domain_protein	1.43	4.98e-07
	Elenta-A2_01840	Integrase_core_domain_protein	1.42	1.04e-07
	Elenta-A2_01464	molydopterin_dinucleotide-binding_region	1.35	6.36e-16
	Elenta-A2_02451	DDEAD/DEAH_box_helicase_domain_protein	1.25	1.18e-25
	Elenta-A2_01910	molydopterin_dinucleotide-binding_region	-1.12	1.9e-19
	Elenta-A2_01559	membrane_bound_O-acyl_transferase	-1.17	2.43e-07
	Elenta-A2_00170	flavocytochrome_c	-1.79	3.16e-10

## Sheet: Supplementary file 1d
		Bacterial strains used in this study
		Eggerthella lenta 1-1-60
		Eggerthella lenta 11C
		Eggerthella lenta 1-3-56
		Eggerthella lenta 14A
		Eggerthella lena 22C
		Eggerthella lenta 28B
		Eggerthella lenta 32-6-I 6 NA
		Eggerthella lenta AB12 #2
		Eggerthella lenta AB8 #2
		Eggerthella lenta AN51LG
		Eggerthella lenta CC7/5 D5 2
		Eggerthella lenta CC8/2 BHI2
		Eggerthella lenta CC8/6 D5 4
		Eggerthella lenta DSM 11767
		Eggerthella lenta DSM 11863
		Eggerthella lenta DSM 15644
		Eggerthella lenta DSM2243
		Eggerthella lenta MR #12
		Eggerthella lenta RC4/6F
		Eggerthella lenta Valencia
		Eggerthella lenta W1 BHI 6
		Eggerthella sinesis DSM 16107
		Eggerthella lenta A2
		Gordonibacter pamelaeae 28C
		Gordonibacter pamelaeae 3C
		Enterococcus faecalis OG1RF
		Eschericia coli MG1655
		Bacteroides fragilis ATCC 25285
		Clostridium sporogenes ATCC 15579
		Edwarsiella tarda ATCC 23685
		Paraeggerthella hongkongensis RC2/2A

## Sheet: Supplementary file 1e
Name	Structure	Natural origin	Catalog number
Protocatechuic acid		Plant	Millipore Sigma, catalog# 37580-25G-F
Hydrocaffeic acid		Plant	Millipore Sigma, catalog# 102601-10G
Caffeic acid		Plant	Millipore Sigma, catalog# C0625-2G
(+)-catechin		Plant	Millimore Sigma, catalog# C1251-5G
(+/-)-catechin		Plant	Millipore Sigma, catalog# C1788-500MG
(-)-epicatechin		Plant	Millipore Sigma, catalog# E1753-1G
Ellagic acid		Plant	Millipore Sigma, catalog# E2250-1G
Hydroxytyrosol		Plant	Ava Chem Scientific, catalog# 2528
DOPAC		Host	Millipore Sigma, catalog# 850217-1G
3,4-DHMA		Host	Carbo Synth, catalog# FD22118
Dopamine		Host	Sigma-Aldrich, catalog# H8502-25G
L-norepinephrine		Host	Matrix Scientific, catalog# 037592-500MG
L-epinephrine		Host	Alfa Aesar, catalog# L04911.06
L-dopa		FDA-approved drug	Oakwood Chemical, catalog# 358380-25g
Methyldopa		FDA-approved drug	Chemcruz, catalog# sc-203092
Carbidopa		FDA-approved drug	Sigma-Aldrich, catalog# PHR1655-1G
Fenoldopam		FDA-approved drug	Sigma Aldrich, catalog# SML0198-10MG
Apomorphine		FDA-approved drug	Sigma Aldrich, catalog# A4393-100MG
Enterobactin		Microbial siderophore	Gift from professor Liz Nolan, MIT
2,3-DHBA		Microbial siderophore	Millipore Sigma, catalog# 126209-5G
