# Supplementary material for: A widely distributed metalloenzyme class enables gut microbial metabolism of host- and diet-derived catechols
Source: eLife. 2020 Feb 18;9:e50845. doi: 10.7554/eLife.50845 (PMC7028382; doi:10.7554/eLife.50845)
Supplement: Supplementary file 2. — Supplementary file 2a. Differentially expressed genes upon exposure of Eggerthella lenta A2 to 0.5 mM hydrocaffeic acid relative to vehicle (>|2|-fold difference, FDR < 0.1). E. lenta A2 was grown with 500 µM hydrocaffeic acid or a vehicle control in BHI medium containing 1% (w/v) arginine and 10 mM formate. The catalytic subunit of the putative hydrocaffeic acid dehydroxylase (hcdh), as well as its predicted 4Fe-4S and membrane anchor partners, are highlighted in red. Data are from n = 4 cultures for each condition. The experiment was performed once. Supplementary file 2b. Differentially expressed genes upon exposure of Eggerthella lenta A2 to 0.5 mM (+)-catechin relative to vehicle (>|2|-fold difference, FDR < 0.1). E. lenta A2 was grown with 500 µM (+)-catechin or a vehicle control in BHI medium containing 1% (w/v) arginine and 10 mM formate. The catalytic subunit of the putative catechin dehydroxylase (cadh), as well as its predicted 4Fe-4S and membrane anchor partners, are highlighted in red. Data are from n = 3 cultures from each condition. The experiment was performed once. Supplementary file 2c. Percent amino acid identity between the putative dehydroxylases from G. pamelaeae 3C and E. lenta A2. Ach stands for acetylene hydratase from P. acetylenicus. This protein is the closest biochemically characterized homolog to the newly identified catechol dehydroxylases. Colors represent % identity, with identity going from low (blue) to high (red). Supplementary file 2d. Differentially expressed genes upon exposure of G. pamelaeae 3C to 0.5 mM DOPAC relative to vehicle (>|2|-fold difference, FDR < 0.1) when catechol was added during exponential phase. G. pamelaeae 3C was grown with 500 µM DOPAC or a vehicle control in BHI medium containing 10 mM formate. The catalytic subunit of the putative DOPAC dehydroxylase (dodh), as well as its predicted 4Fe-4S partner, are highlighted in red. The data are from n = 3 cultures for each condition. The experiment was performed on [file elife-50845-supp2.xlsx]

## Sheet: Supplementary file 2a
	Locus tag	Annotation	log2FoldChange	p-value (FDR<0.01)
	Elenta-A2_02813	Hypothetical protein (hcdh membrane anchor)	11.21	4.7e-62
	Elenta-A2_02815	Molybdopterin dinucleotide binding region (hcdh)	11.14	4.7e-163
	Elenta-A2_02814	4Fe-4S ferredoxin (hcdh 4Fe4S partner)	10.31	8e-53
	Elenta-A2_02810	4Fe-4S ferredoxin	8.31	6.8e-18
	Elenta-A2_02816	Hypothetical protein	7.75	3.1e-12
	Elenta-A2_02811	4Fe-4S ferredoxin	6.83	6.7e-17
	Elenta-A2_02820	Hypothetical protein	6.37	5.3e-47
	Elenta-A2_02819	Cytoplasmic chaperone TorD family protein	6.29	2.7e-52
	Elenta-A2_02817	Hypothetical protein	5.8	5.1e-40
	Elenta-A2_02822	Transcriptional regulator, LuxR family	3.8	5.6e-14
	Elenta-A2_02821	hypothetical_protein	2.7	2.95e-83
	Elenta-A2_02818	Hypothetical protein	2.55	0.00013
	Elenta-A2_01460	formate_dehydrogenase_family_accessory_protein	2.12	1.32e-05
	Elenta-A2_01461	formate_dehydrogenase_accessory_protein	1.67	8.9e-07
	Elenta-A2_01459	peptidase_C60_sortase_A_and_B	1.52	0.00486767
	Elenta-A2_01464	molydopterin_dinucleotide-binding_region	1.5	3.06e-48
	Elenta-A2_01463	4Fe-4S_ferredoxin	1.44	2.12e-23
	Elenta-A2_01465	molybdopterin_oxidoreductase_Fe4S4_region	1.39	1.76e-14
	Elenta-A2_01462	hypothetical_protein	1.22	1.24e-11
	Elenta-A2_02489	ABC_transporter_related	1.1	7.47e-06
	Elenta-A2_01331	hypothetical_protein	1.08	0.000121478
	Elenta-A2_00815	hypothetical_protein	-1.08	1.49e-05
	Elenta-A2_01910	molydopterin_dinucleotide-binding_region	-1.26	7.51e-17
	Elenta-A2_01911	4Fe-4S_ferredoxin	-1.36	5.47e-16

## Sheet: Supplementary file 2b
	Locus tag	Annotation	log2FoldChange	p-value (FDR<0.1)
	Elenta-A2_00233	fumarate_reductase/succinate_dehydrogenase	14.38	3.22e-38
	Elenta-A2_00691	fumarate_reductase/succinate_dehydrogenase	11.32	2.09e-32
	Elenta-A2_00578	4Fe-4S_ferredoxin_iron-sulfur_binding_domain_protein	9.09	1.24e-24
		(cadh 4Fe4S partner)
	Elenta-A2_00577	molydopterin_dinucleotide-binding_region (cadh)	8.85	2.5e-123
	Elenta-A2_00579	hypothetical_protein (cadh membrane anchor)	8	5.4e-60
	Elenta-A2_01215	fumarate_reductase/succinate_dehydrogenase	7.55	0
	Elenta-A2_00587	hypothetical_protein	3.99	6.36e-09
	Elenta-A2_01625	NADH:flavin_oxidoreductase/NADH_oxidase	3.99	8.47e-141
	Elenta-A2_01615	Enoyl-CoA_hydratase/isomerase	3.95	5.16e-178
	Elenta-A2_01619	hypothetical_protein	3.91	2.9e-66
	Elenta-A2_01621	Electron_transfer_flavoprotein_alpha/beta-_subunit	3.87	1.6e-20
	Elenta-A2_02817	hypothetical_protein	3.86	5.4e-12
	Elenta-A2_01620	Electron transfer flavoprotein alpha subunit	3.84	5.01e-23
	Elenta-A2_01613	DL-carnitine dehydratase/bile acid inducible protein F	3.82	1.66e-168
	Elenta-A2_01624	acyl-CoA_dehydrogenase_domain_protein	3.79	2.85e-217
	Elenta-A2_01614	NADPH dependent FMN reductase	3.72	6.55e-23
	Elenta-A2_01622	acyl-CoA_dehydrogenase_domain_protein	3.71	7.25e-25
	Elenta-A2_01609	hypothetical_protein	3.22	2.83e-43
	Elenta-A2_01618	hydrolase	3.15	3.25e-60
	Elenta-A2_01608	transcriptional regulator2C LysR family	2.98	3.05e-71
	Elenta-A2_01616	AMP-dependent_synthetase_and_ligase	2.97	1.06e-20
	Elenta-A2_01610	transcriptional_regulator2C_LysR_family	2.8	3.39e-21
	Elenta-A2_01546	thioesterase_superfamily_protein	2.71	8.1e-08
	Elenta-A2_01617	beta-lactamase_domain_protein	2.55	1.09e-40
	Elenta-A2_01493	fumarate_reductase/succinate_dehydrogenase	2.54	3.05e-33
	Elenta-A2_01611	major_facilitator_superfamily_MFS_1	2.4	6.45e-60
	Elenta-A2_00576	transcriptional_regulator2C_LuxR_family	2.16	7.78e-19
	Elenta-A2_00581	molybdopterin_dinucleotide-binding_region	1.62	1.75e-10
	Elenta-A2_01602	acyl-CoA_dehydrogenase_domain_protein	1.62	2.17e-21
	Elenta-A2_02346	argininosuccinate_synthase	1.43	2.86e-24
	Elenta-A2_00138	ABC_transporter_related	1.41	8.05e-13
	Elenta-A2_02622	chaperonin_GroEL	1.3	4.58e-60
	Elenta-A2_00137	hypothetical_protein	1.29	1.67e-08
	Elenta-A2_00139	transcriptional_regulator2C_TetR_famil	1.27	1.8e-08
	Elenta-A2_01820	phospho-N-acetylmuramoyl-pentapeptide-transferase	1.23	1.99e-24
	Elenta-A2_01129	MATE_efflux_family_protein	1.21	1.1e-19
	Elenta-A2_02587	hypothetical_protein	1.19	1.09e-34
	lenta-A2_00167	cell_wall/surface_repeat_protein	1.19	3.32e-13
	Elenta-A2_00256	Rhodanese_domain_protei	1.17	7.25e-22
	Elenta-A2_02345	argininosuccinate_lyase	1.08	1.01e-10
	Elenta-A2_01456	chaperonin_Cpn10	1.08	7.89e-25
	Elenta-A2_01456	aspartate_carbamoyltransferase	1.06	8.19e-10
	Elenta-A2_01326	hypothetical_protein	-1	1.52e-13
	Elenta-A2_02456	hypothetical_protein	-1.01	1.47e-24
	Elenta-A2_00896	hypothetical_protein	-1.02	5.9e-12
	Elenta-A2_02832	hypothetical_protein	-1.02	5.13e-30
	Elenta-A2_01974	hypothetical_protein	-1.12	5.15e-24
	Elenta-A2_02146	hypothetical_protein	-1.12	4.71e-33
	Elenta-A2_00730	polar_amino_acid_ABC_transporter	-1.13	8.82e-09
	Elenta-A2_01591	hypothetical_protein	-1.13	2.1e-13
	Elenta-A2_01359	4Fe-4S_ferredoxin_iron-sulfur_binding_domain_protein	-1.14	1.43e-08
	Elenta-A2_01382	General_secretory_system_II_protein_E_domain_protein	-1.17	1.43e-07
	Elenta-A2_01347	Endoribonuclease_L-PSP	-1.21	1.91e-31
	Elenta-A2_02130	extracellular_solute-binding_protein	-1.21	2.28e-20
	Elenta-A2_02855	chaperone_protein_DnaK	-1.22	8.03e-17
	Elenta-A2_00895	tRNA_pseudouridine_synthase_A	-1.25	1.14e-24
	Elenta-A2_01051	extracellular_solute-binding_protein	-1.26	3.04e-36
	Elenta-A2_00971	ABC_transporter_related	-1.26	5.43e-38
	Elenta-A2_01601	Aldehyde_Dehydrogenase	-1.26	2.44e-15
	Elenta-A2_00527	anaerobic_dimethyl_sulfoxide_reductase	-1.34	1.02e-07
	Elenta-A2_00974	polar_amino_acid_ABC_transporte	-1.39	3.48e-22
	Elenta-A2_02132	hypothetical_protein	-1.43	6.39e-18
	Elenta-A2_02336	hypothetical_protein	-1.44	7.43e-31
	Elenta-A2_02706	membrane_protein_of_unknown_function	-1.44	4.33e-33
	Elenta-A2_02665	two_component_transcriptional_regulator2C	-1.45	5.14e-37
	Elenta-A2_0097	extracellular_solute-binding_protein	-1.46	9.23e-30
	Elenta-A2_01226	ATPase2C_P-type	-1.52	7.75e-18
	Elenta-A2_00973	polar_amino_acid_ABC_transporter	-1.54	1.91e-30
	Elenta-A2_00729	extracellular_solute-binding_protein	-1.6	5.32e-16
	Elenta-A2_00458	heat_shock_protein_Hsp20	-1.7	1.35e-13
	Elenta-A2_01911	4Fe-4S_ferredoxin_iron-sulfur_binding_domain_protein	-1.71	2.48e-17
	Elenta-A2_01480	22C5-didehydrogluconate_reductase	-1.79	8.27e-34
	Elenta-A2_01940	Mg2_transporter_protein	-1.85	8.42e-35
	Elenta-A2_02609	lipase_class_3	-1.9	6.13e-27
	Elenta-A2_01586	membrane_protein_of_uknown_functio	-1.91	4.52e-11
	Elenta-A2_00505	hypothetical_protein	-1.99	2.65e-26
	Elenta-A2_01113	hypothetical_protein	-2.02	1.42e-09
	Elenta-A2_01910	molydopterin_dinucleotide-binding_region	-2.09	1.29e-56
	Elenta-A2_01464	molydopterin_dinucleotide-binding_region	-2.11	6.01e-18
	Elenta-A2_00508	Polysulphide_reductase_NrfD	-2.15	9.73e-25
	Elenta-A2_01462	hypothetical_protein	-2.15	2.94e-10
	Elenta-A2_00506	molybdopterin_oxidoreductase	-2.28	6.51e-37
	Elenta-A2_00676	Radical_SAM_domain_protein	-2.56	3.98e-15
	Elenta-A2_02199	acterioferritin	-2.6	4.1e-11
	Elenta-A2_00507	4Fe-4S_ferredoxin_iron-sulfur_binding_domain_protein	-2.89	1.77e-11

## Sheet: Supplementary file 2c
		Ach	Cldh	Dodh	Dadh	Cadh	Hcdh
	Ach		26	23.9	19.3	20.7	15.7
	Cldh	25.8		45.2	22	23.2	17
	Dodh	23.9	45		20.2	22	15.7
	Dadh	19.3	22	20.2		50.9	35.3
	Cadh	20.7	23	22	50.9		39
	Hcdh	15.7	17	15.7	35.3	39

## Sheet: Supplementary file 2d
	Locus tag	Annotation	log2FoldChange	p-value (FDR<0.1)
	C1877_00905	Radical_SAM_protein	11.21	5.39e-80
	C1877_13890	MFS_transporter	11.16	0
	C1877_00920	nitrate_ABC_transporter_substrate-binding_protein	10.96	1.32e-49
	C1877_13905	Dehydrogenase (dodh)	10.81	0
	C1877_13900	Oxidoreductase (dodh 4Fe-4S partner)	10.63	0
	C1877_00910	ABC_transporter_permease	10.28	1.31e-104
	C1877_13910	Hypothetical_protein	10.27	1.64e-171
	C1877_13895	Hypothetical_protein	10.1	0
	C1877_00915	ABC_transporter_ATP-binding_protein	9.66	1.72e-116
	C1877_00925	BC_transporter_permease	9.25	7.05e-46
	C1877_07205	GTPase_G3E_family	8.99	1.57e-271
	C1877_13865	rimI:ribosomal-protein-alanine_N-acetyltransferase	8.92	2.22e-252
	C1877_13885	hypothetical_protein	8.9	6.02e-288
	C1877_07570	hypothetical_protein	8.78	1.07e-254
	C1877_04445	sodium:solute_symporter	8.58	0
	C1877_07565	dehydrogenase	8.32	5.42e-93
	C1877_13930	hypothetical_protein	8.28	4.42e-32
	C1877_13870	hypothetical_protein	8.04	1.77e-70
	C1877_07200	DUF3641_domain-containing_protein	8	0
	C1877_13875	hypothetical_protein	7.85	0
	C1877_07185	ABC_transporter_substrate-binding_protein	7.85	6.85e-131
	C1877_07195	ABC_transporter_permease	7.74	1.21e-235
	C1877_07180	DUF1847_domain-containing_protein	7.59	3.2e-64
	C1877_07580	MFS_transporter	7.55	0
	C1877_07210	methyltransferase	7.34	4.27e-300
	C1877_07190	ABC_transporter_ATP-binding_protein	7.23	7.82e-100
	C1877_13880	hypothetical_protein	7.04	1.69e-91
	C1877_09915	radical_SAM_protein	6.85	0
	C1877_00930	ABC_transporter_ATP-binding_protein	6.44	1.27e-103
	C1877_09910	hypothetical_protein	6.36	0
	C1877_04725	hypothetical_protein	5.95	0
	C1877_00940	hypothetical_protein	5.89	1.85e-133
	C1877_13835	DUF3641_domain-containing_protein	5.56	0
	C1877_13840:	4-carboxymuconolactone_decarboxylase	5.32	0
	C1877_08360	ABC_transporter_ATP-binding_protein	5.24	1.8e-24
	C1877_07315	hypothetical_protein	5.22	1.59e-220
	C1877_13860	hypothetical_protein	5.14	0
	C1877_07560	oxidoreductase	5.03	4.6e-210
	C1877_13785	4Fe-4S_ferredoxin	4.89	2.47e-20
	C1877_02200	ATP-binding_protein	4.81	0.0207821
	C1877_08370	16S_rRNA_Adenine_N6-dimethyltransferase_RsmA	4.8	7.32e-09
	C1877_08365	ABC_transporter_ATP-binding_protein	4.78	3.06e-14
	C1877_13785	4Fe-4S_ferredoxin	4.78	4.68e-300
	C1877_13790	dehydrogenase	4.61	0
	C1877_13780	hypothetical_protein	4.53	2.22e-238
	C1877_08355	energy-coupling_factor_transporter	4.25	4.16e-21
	C1877_04450	hypothetical_protein	4.02	1.11e-292
	C1877_01125	phenylacetate--CoA_ligase	3.97	2.44e-97
	C1877_05190	hypothetical_protein	3.93	0.0363621
	C1877_03100	hypothetical_protein	3.82	5.89e-68
	C1877_14220	hypothetical_protein	3.74	0.0431125
	C1877_12815	arylamine_N-acetyltransferase	3.69	0
	C1877_14165	conjugal_transfer_protein_TraC	3.65	0.0459934
	C1877_00945	hypothetical_protein	3.6	0.00145369
	C1877_13920	LuxR_family_transcriptional_regulator	3.42	9.77e-108
	C1877_13850	hypothetical_protein	3.41	1.34e-201
	C1877_13915	hypothetical_protein	3.39	0
	C1877_13925	hypothetical_protein	3.18	2.86e-187
	C1877_01120	hypothetical_protein	3.01	1.5e-263
	C1877_13775	hypothetical_protein	3	1.8e-127
	C1877_13770	dehydrogenase	2.94	0
	C1877_07550	hypothetical_protein	2.92	3.78e-119
	C1877_13970	amidohydrolase	2.74	6.24e-178
	C1877_13765	DUF2064_domain-containing_protein	2.53	9.85e-74
	C1877_03335	TrpB-like_pyridoxal_phosphate-dependent_enzyme	2.52	7.14e-11
	C1877_05595	hypothetical_protein	2.42	0.0701041
	C1877_09905	ABC_transporter_ATP-binding_protein	2.36	4.47e-128
	C1877_07555	hypothetical_protein	2.17	1.47e-56
	C1877_06120	hypothetical_protein	2.1	0.0252065
	C1877_07530	hypothetical_protein	2.05	5.92e-64
	C1877_13755	4Fe-4S-binding_protei	2	2.31e-93
	C1877_07585	helix-turn-helix_transcriptional_regulator	1.96	3.32e-60
	C1877_09900	hypothetical_protein	1.95	7.02e-82
	C1877_13760	radical_SAM_protein	1.93	1.44e-163
	C1877_13750	hypothetical_protein	1.88	2.68e-59
	C1877_13230	formate_dehydrogenase	1.87	0.00353983
	C1877_00935	hypothetical_protein	1.79	4.1e-22
	C1877_04455	endoglucanase	1.74	3.14e-05
	C1877_13855	hypothetical_protein	1.73	1.73e-73
	C1877_00900	hypothetical_protein	1.72	0.0101468
	C1877_07535	hypothetical_protein	1.71	7.39e-45
	C1877_07295	MFS_transporter	1.66	0.0171476
	C1877_14955	hypothetical_protein	1.63	8.11e-66
	C1877_07310:	hypothetical_protein	1.59	4.2e-07
	C1877_02570	MFS_transporter	1.53	1.11e-34
	C1877_14780:	site-2_protease_family_protein	1.5	0.000440981
	C1877_02990	DUF488_domain-containing_protein:	1.33	0.0419925
	C1877_07300	helix-turn-helix_transcriptional_regulator	1.28	7.21e-08
	C1877_04550:	hypothetical_protein	1.25	1.64e-16
	C1877_02800	MFS_transporter	1.22	0.0451938
	C1877_12325	AraC_family_transcriptional_regulator	1.13	0.0279979
	C1877_03030	DUF4405_domain-containing_protein	1.09	5.62e-16
	C1877_00895	MFS_transporter	1.09	4.56e-05
	C1877_07575	hypothetical_protein	1.08	2.59e-27
	C1877_09415	GNAT_family_N-acetyltransferase	1.08	9.38e-18
	C1877_03295:	hypothetical_protein	1.08	0.000322218
	C1877_03035	nickel-dependent_hydrogenase_large_subunit	1.03	8.67e-19
	C1877_09205	amino_acid_ABC_transporter_permease	1.01	0.0265681
	C1877_01130	LysR_family_transcriptional_regulator	1.01	1.73e-14
	C1877_14775	3-oxoacyl-ACP_reductase	1	0.00432078
	C1877_06060	hypothetical_protein	-1.08	7.29e-12
	C1877_06730	polysulfide_reductase	-1.08	3.98e-06
	C1877_06720	hypothetical_protein	-1.09	7.77e-27
	C1877_10640	hypothetical_protein	-1.13	4.05e-17
	C1877_10720	LysR_family_transcriptional_regulator	-1.16	4.49e-22
	C1877_06070:	hypothetical_protein	-1.17	1.93e-10
	C1877_10665	putative_sulfate_exporter	-1.29	1.91e-05
	C1877_10635	hypothetical_protein	-1.29	2.87e-19
	C1877_10715	nitrate_reductase_gamma_subuni	-1.35	1.71e-16
	C1877_10690	porphobilinogen_synthase	-1.38	1.14e-10
	C1877_10685	hemL:glutamate-1-semialdehyde-aminomutase	-1.42	7.29e-12
	C1877_10660	hypothetical_protein	-1.45	2.18e-05
	C1877_10605	sulfurtransferase_TusE	-1.51	2.66e-14
	C1877_10630	menaquinol_oxidoreductase	-1.53	4.72e-23
	C1877_10600	cobyrinic_acid_-diamide_synthase	-1.56	5.62e-16
	C1877_10705	glutamyl-tRNA_reductase	-1.6	8.69e-18
	C1877_10700	hydroxymethylbilane_synthase	-1.61	3.95e-15
	C1877_10695	cobA:uroporphyrinogen-III_C-methyltransferase	-1.63	4.61e-10
	C1877_10610	menaquinol_oxidoreductase	-1.63	1.98e-27
	C1877_10710	Fe-S-binding_protein	-1.64	1.89e-17
	C1877_05025	dehydrogenase	-1.68	1.09e-05
	C1877_10625	Fe-S-binding_protein	-1.68	1.46e-26
	C1877_10615	4Fe-4S_dicluster_domain-containing_protein	-1.71	1.62e-31
	C1877_10620	menaquinol_oxidoreductase	-1.77	3.21e-26
	C1877_07910	hypothetical_protein	-2.12	0.000850235
	C1877_06075	IS1_family_transposase	-2.16	0.0517552
	C1877_05990	dehydrogenase	-2.2	0.068743
	C1877_06180	DUF1269_domain-containing_protei	-2.66	0.0726635
	C1877_02225	hypothetical_protein	-2.68	0.04009
	C1877_05995	oxidoreductase	-3.4	0.0623113
	C1877_10895	MFS_transporter	-3.73	0.0265681
	C1877_14300	hypothetical_protein	-4.12	0.0761805
	C1877_02470	transporter	-5.02	0.00233782

## Sheet: Supplementary file 2e
	Locus tag	Annotation	log2FoldChange	p-value (FDR<0.1)
	C1877_00910	ABC_transporter_permease	8.05	4.65e-114
	C1877_00920	nitrate_ABC_transporter_substrate-binding_protein	7.78	1.13e-160
	C1877_13870	hypothetical_protein	7.42	3.46e-42
	C1877_13910	hypothetical_protein	7.33	3.64e-88
	C1877_07205	GTPase_G3E_family	7.23	1.53e-141
	C1877_13890	MFS_transporter	7.22	0
	C1877_13905	Dehydrogenase (dodh)	7.2	0
	C1877_00915	ABC_transporter_ATP-binding_protein	7.18	3.24e-140
	C1877_13900	Oxidoreductase (dodh 4Fe-4S partner)	7.11	0
	C1877_13895	hypothetical_protein	7.07	0
	C1877_00925	ABC_transporter_permease	7.05	1.11e-34
	C1877_13930	hypothetical_protein	6.73	7.65e-19
	C1877_13875	hypothetical_protein	6.56	1.51e-189
	C1877_00905	radical_SAM_protein	6.53	1.31e-59
	C1877_07190	ABC_transporter_ATP-binding_protein	6.44	3.33e-68
	C1877_13865	ribosomal-protein-alanine_N-acetyltransferase	6.36	2.98e-44
	C1877_07200	DUF3641_domain-containing_protein	6.12	7.13e-248
	C1877_07195	ABC_transporter_permease	6.12	9.85e-146
	C1877_07185	ABC_transporter_substrate-binding_protein:	6.02	2.87e-155
	C1877_07180	DUF1847_domain-containing_protein	6.01	2.12e-97
	C1877_13885	hypothetical_protein	5.77	9.05e-135
	C1877_07210	methyltransferase	5.43	4.47e-140
	C1877_04445	sodium:solute_symporter	5.03	4.08e-263
	C1877_13880	hypothetical_protein	4.16	1.04e-25
	C1877_00930	ABC_transporter_ATP-binding_protein	3.88	4.79e-147
	C1877_13835	DUF3641_domain-containing_protei	3.8	2.7e-254
	C1877_0731	hypothetical_protein	3.7	3.07e-100
	C1877_00940	hypothetical_protein	3.7	2.5e-59
	C1877_13840	4-carboxymuconolactone_decarboxylase	3.42	3.87e-196
	C1877_09910	hypothetical_protein	3.36	3.42e-41
	C1877_09915	hypothetical_protein	3.27	2.53e-244
	C1877_09915:	radical_SAM_protein	2.68	6.77e-208
	C1877_00935	hypothetical_protein	2.16	3.97e-38
	C1877_04450	hypothetical_protein	1.81	1.44e-61
	C1877_09900:	hypothetical_protein	1.67	2.49e-52
	C1877_09905	ABC_transporter_ATP-binding_protein	1.6	5.09e-57
	C1877_13860	hypothetical_protein	1.6	9.49e-24
	C1877_14955	hypothetical_protein	1.41	2.2e-48
	C1877_13775	hypothetical_protein	1.32	1.58e-25
	C1877_13970	amidohydrolase	1.29	6.59e-41
	C1877_13785	4Fe-4S_ferredoxin	1.27	4.4e-25
	C1877_13790	dehydrogenase	1.23	1.36e-34
	C1877_13780:	hypothetical_protein	1.21	4.91e-18
	C1877_13750	hypothetical_protein	1.2	8.36e-32
	C1877_13925	hypothetical_protein	1.2	3.24e-28
	C1877_13770:	dehydrogenase	1.18	3.12e-61
	C1877_13915:	hypothetical_protein:	1.18	5.7e-44
	C1877_13755	4Fe-4S-binding_protein	1.07	5.38e-33
	C1877_10245	hypothetical_protein	-1.14	0.000531507
	C1877_10635	hypothetical_protein	-1.33	1.41e-19
	C1877_10625	Fe-S-binding_protein	-1.35	2.25e-16
	C1877_10640	hypothetical_protein	-1.37	1.64e-23
	C1877_10610	menaquinol_oxidoreductase	-1.4	4.17e-19
	C1877_10620	menaquinol_oxidoreductase	-1.42	6.01e-15
	C1877_10630	menaquinol_oxidoreductase	-1.45	7.21e-20
	C1877_10710	Fe-S-binding_protein	-1.48	1.09e-13
	C1877_10600	cobyrinic_acid_diamide_synthase	-1.51	2.26e-14
	C1877_10615	4Fe-4S_dicluster_domain-containing_protein	-1.51	1.89e-22
	C1877_10705	glutamyl-tRNA_reductase:	-1.55	4.09e-15
	C1877_10715	nitrate_reductase_gamma_subunit	-1.56	3.01e-20
	C1877_02335	ferrous_iron_transporter_B	-1.57	1.6e-06
	C1877_10655	hypothetical_protein	-1.65	1.43e-06
	C1877_10605	sulfurtransferase_TusE	-1.65	3.3e-16
	C1877_10670	dsrB:dissimilatory-type_sulfite_reductase	-1.66	1.58e-07
	C1877_10685	glutamate-1-semialdehyde-aminomutase	-1.75	8.83e-16
	C1877_10690	porphobilinogen_synthase	-1.78	4.43e-15
	C1877_10665	putative_sulfate_exporter_family_transporter	-1.79	1.14e-09
	C1877_10675:	dsrA:dissimilatory-type_sulfite_reductase_alpha_subunit	-1.87	9.9e-11
	C1877_10660	hypothetical_protein	-1.92	1.63e-08
	C1877_10695	uroporphyrinogen-III_C-methyltransferase	-1.95	2.68e-13
	C1877_10650	hypothetical_protein	-1.97	1.99e-06
	C1877_10700	hydroxymethylbilane_synthase	-1.98	1.92e-19
	C1877_10680	4Fe-4S_dicluster_domain-containing_protein	-2.04	4.64e-09

## Sheet: Supplementary file 2f
	Locus tag	Annotation	Coverage	# AAs	MW [kDa]
	237-Elenta-A2_02071	Pyruvate ferredoxin/flavodoxin oxidoreductase	82	1180	127.6
	237-Elenta-A2_02815	Molybdopterin dinucleotide binding region	61	1193	133.9(a)/130.5(b)
	237-Elenta-A2_01884	Single-stranded-DNA-specific exonuclease	54	1122	120.5
	237-Elenta-A2_01074	UvrD/REP helicase	41	1165	123
