# Supplementary material for: A widely distributed metalloenzyme class enables gut microbial metabolism of host- and diet-derived catechols
Source: eLife. 2020 Feb 18;9:e50845. doi: 10.7554/eLife.50845 (PMC7028382; doi:10.7554/eLife.50845)
Supplement: Supplementary file 3. — Supplementary file 3a. Accession numbers (Uniprot and Genbank) of putative Eggerthella and Gordonibacter dehydroxylases identified in this study. Supplementary file 3b. Accession numbers of bis-MGD enzymes used to generate the phylogenetic tree of the bis-MGD enzyme family (Figure 6). Supplementary file 3c. Accession numbers (Uniprot) and organismal origin of representative dehydroxylases identified from phylogenetic tree in Figure 7—figure supplement 3. Accession numbers (Uniprot and Genbank) of putative Eggerthella and Gordonibacter dehydroxylases identified in this study. [file elife-50845-supp3.xlsx]

## Sheet: Supplementary file 3a
	Name	Abbreviated name	Organism	UNIPROT ID	Genbank protein ID
	Dopamine dehydroxylase	dadh	E. lenta A2	A0A369NIV7	RDC23575.1
	Hydrocaffeic acid dehydroxylase	hcdh	E. lenta A2	A0A369MIX7	RDC18391.1
	Catechin dehydroxylase	cadh	E. lenta A2	C8WLG2	RDC23615.1
	Dopac dehydroxylase	dodh	G. pamelae 3C	A0A369LV65	RDB62136.1
	Catechol lignan dehydroxylase	cldh	G. pamelae 3C	A0A369M2I8	RDB65137.1

## Sheet: Supplementary file 3b
		Uniprot accession #
		Q93PD2_9RHOO
		AAQ01672
		AAU11839
		AAU11840
		Q5NZV2_AROAE
		AAZ43099
		A0YDJ9_9GAMM
		A7LI70_9RHOO
		A8ZZM3_DESOH
		ZP_01288441
		ZP_01288668
		ZP_01667237
		ZP_03045699
		ZP_02830247
		E9NQE6_9RHOO
		F7V8S9_CLOSS
		ABB51928
		YP_091657
		AHY_PELAE
		ZP_01034989
		PCRA_DECAR
		AAW37220
		A0A096LIK4_9ACTN
		NP_071207
		NP_560168
		NP_560307
		NP_560860
		YP_004130
		YP_055228
		YP_076161
		YP_217061
		YP_252569
		YP_263899
		YP_361367
		YP_387178
		YP_435153
		YP_583300
		YP_638431
		YP_682694
		YP_741477
		YP_743256
		YP_840970
		YP_916609
		YP_920808
		YP_931484
		YP_964317
		YP_001002743
		YP_001013239
		YP_001020903
		YP_001055297
		YP_001056256
		YP_001056789
		YP_001152746
		YP_001153186
		YP_001157040
		YP_001233491
		YP_001408699
		YP_001409193
		YP_001562139
		YP_001585636
		YP_001685488
		YP_001951391
		YP_001951406
		YP_002016790
		YP_002129528
		YP_002457721
		NP_147849
		NP_902213
		NP_906381
		NP_906934
		NP_906980
		NP_907333
		NP_907591
		YP_310854
		YP_466957
		YP_524035
		YP_524325
		YP_571843
		YP_871247
		YP_001318866
		YP_001319191
		YP_001800219
		YP_001942454
		YP_002734116
		YP_002796487
		YP_002828931
		YP_002882810
		YP_002949599
		YP_003099832
		YP_003151500
		YP_003161194
		YP_003182037
		YP_003303433
		YP_003303806
		YP_003311189
		YP_003381996
		YP_003393294
		YP_003863182
		YP_001099944
		YP_001423003
		YP_001632440
		YP_003699297
		YP_001753784
		A0A0F7JXH0_9GAMM
		CAM58792
		A0A0S8CQF4_9BACT
		A0A160FRG8_9BURK
		AAU11841
		AAQ19491
		ABP63660
		NP_213709
		NP_951834
		YP_001634827
		NP_415742
		NP_415991
		EAT99379
		A0A1C5V9P8_9FIRM
		A0A1E4LUP6_9BURK
		A0A1F2WFM2_9ACTN
		A0A1F8PG51_9CHLR
		A0A1M3JW53_9BURK
		A0A1M6E5L2_9FIRM
		A0A1M6FDE7_9FIRM
		A0A1L3GSN8_9DELT
		A0A1W6CT59_9PROT
		YP_429324
		AAR05656
		NP_460720
		A0A1G6AWF4_EUBOX
		A0A1Z8A857_9GAMM
		AIOA_ALCFA
		AIOA_HERAR
		PGTL_PELAC
		A0A2A4UZ40_9GAMM
		A0A369NIV7
		A0A369MIX7
		C8WLG2
		A0A369LV65
		A0A369M2I8
		A0A369M6P4
		A0A369M3A8

## Sheet: Supplementary file 3c
		Representative sequence	Organism	Uniprot accession #
		1	Gordonibacter pamelaeae	A0A369M3J7
		2	Gordonibacter pamelaeae	A0A369M6U3
		3	Desulfitobacterium metallireducens	W0E998
		4	Gordonibacter sp.	A0A369LVG2
		5	Clostridium ljungdahlii	D8GM28
		6	Eggerthella sp.	F0HRV1
		7	Eggerthella lenta	C8WM38
		8	Eggerthella lenta	A0A369MIX7
		9	Eggerthella lenta	A0A369NIV7
		10	Streptomyces zelensis	A0A1W6EUS9
		11	Thauera aromatica	A0A088SRF0
		12	Gordonibacter pamelaeae	A0A369LSI8
		13	Gordonibacter pamelaeae	D6E7S9
		14	Denitrobacterium detoxificans	A0A172RZZ3
		15	Bradyrhizobium canariense	A0A1H1VHY4
		16	Thiocapsa roseopersicina	X5FC28
		17	Thioflavicoccus mobilis 8321	L0GVW7
		18	Ferroglobus placidus	D3S147
